# Supplementary material
Source: PubMed Central journal article supplement (PMC7153981)
Supplement: NIHMS1054808-supplement-Supp_info.pdf [file NIHMS1054808-supplement-Supp_info.pdf]

# Supplementary Figure S1

**A**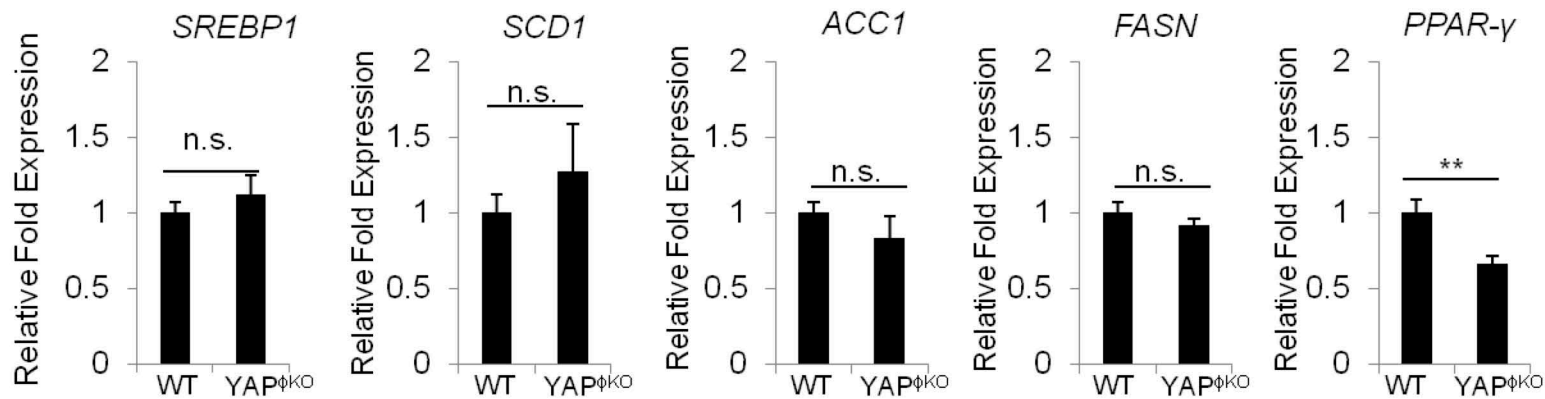**B**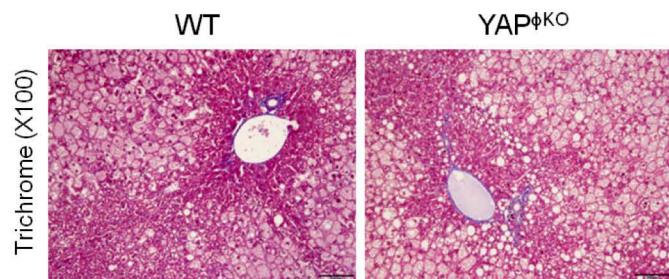**C**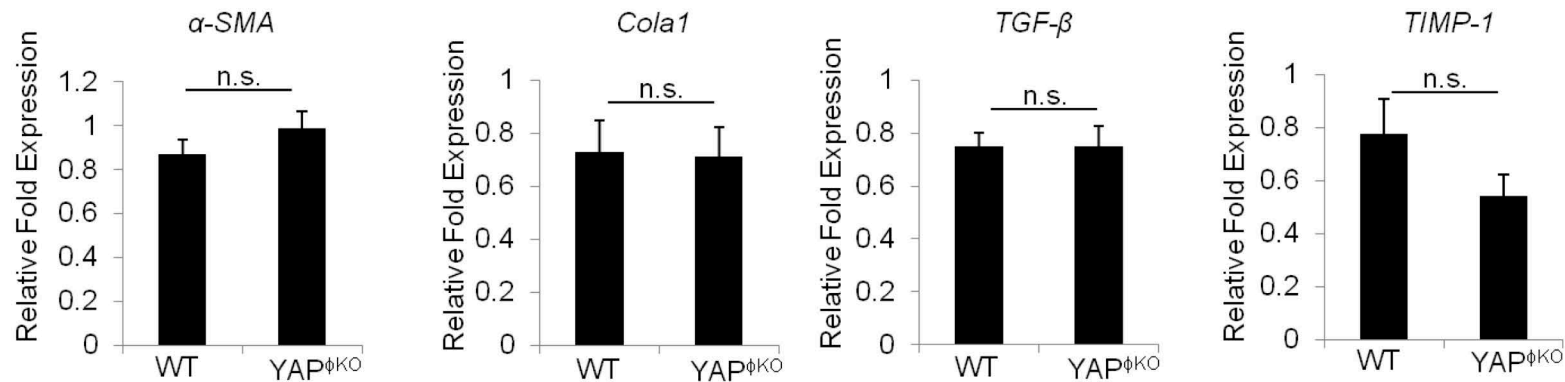

# Supplementary Figure S2

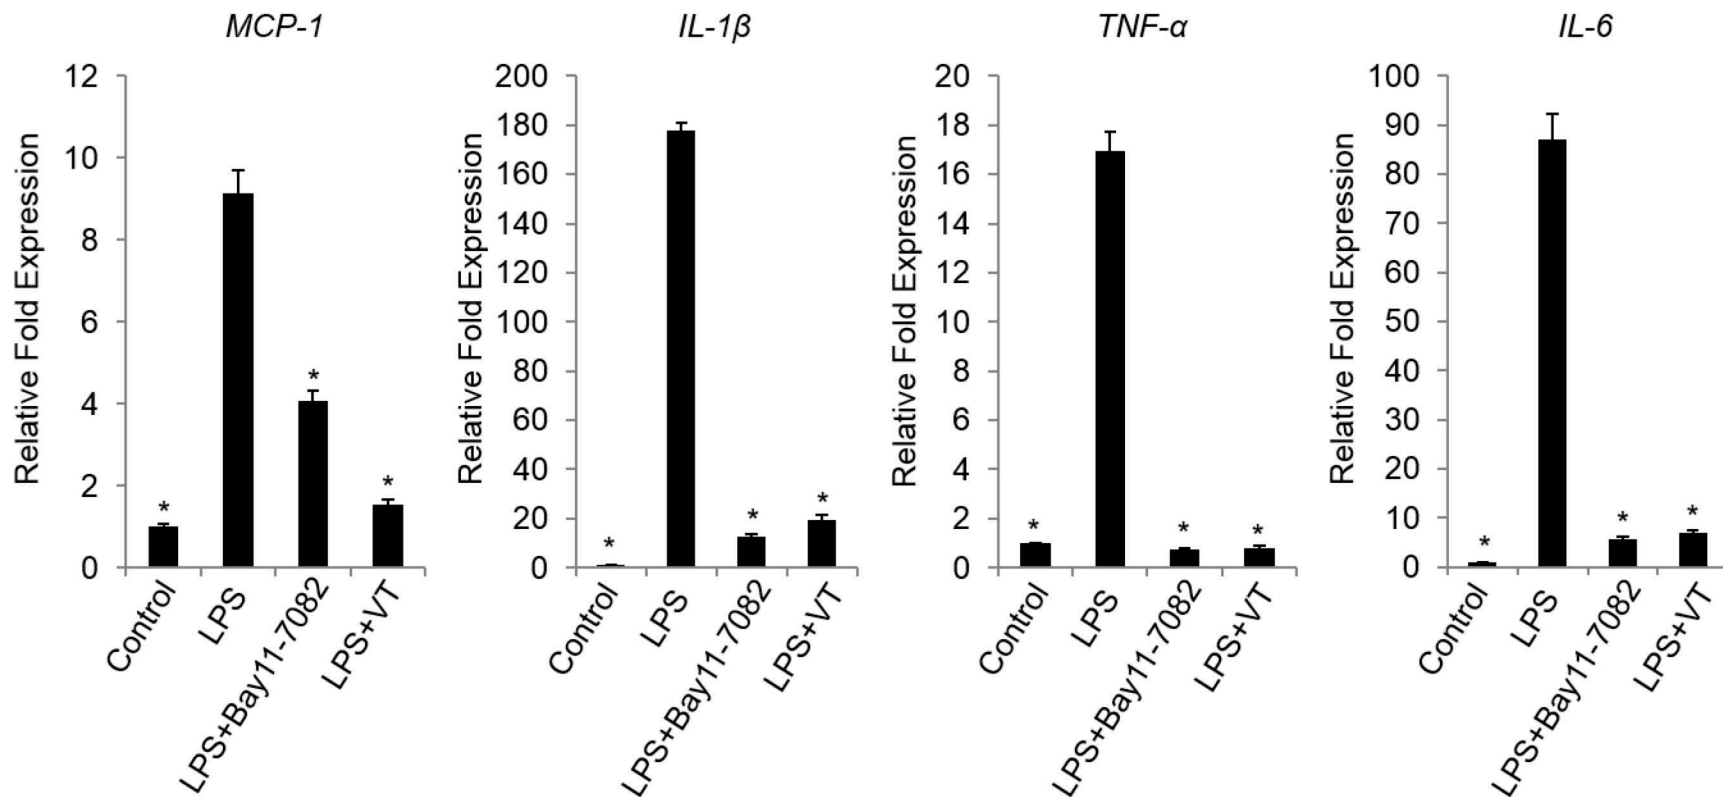

# Supplementary Figure S3

**A**

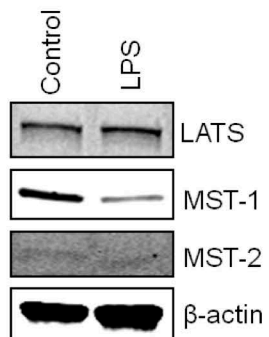

**B**

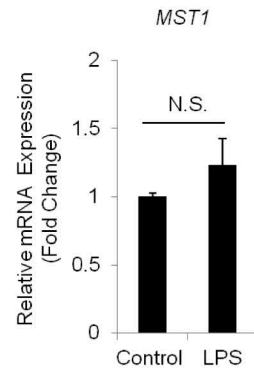

**C**

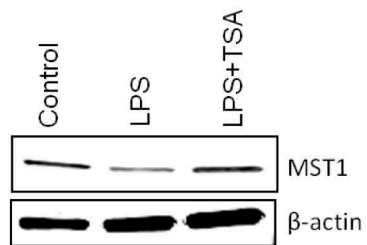

**D**

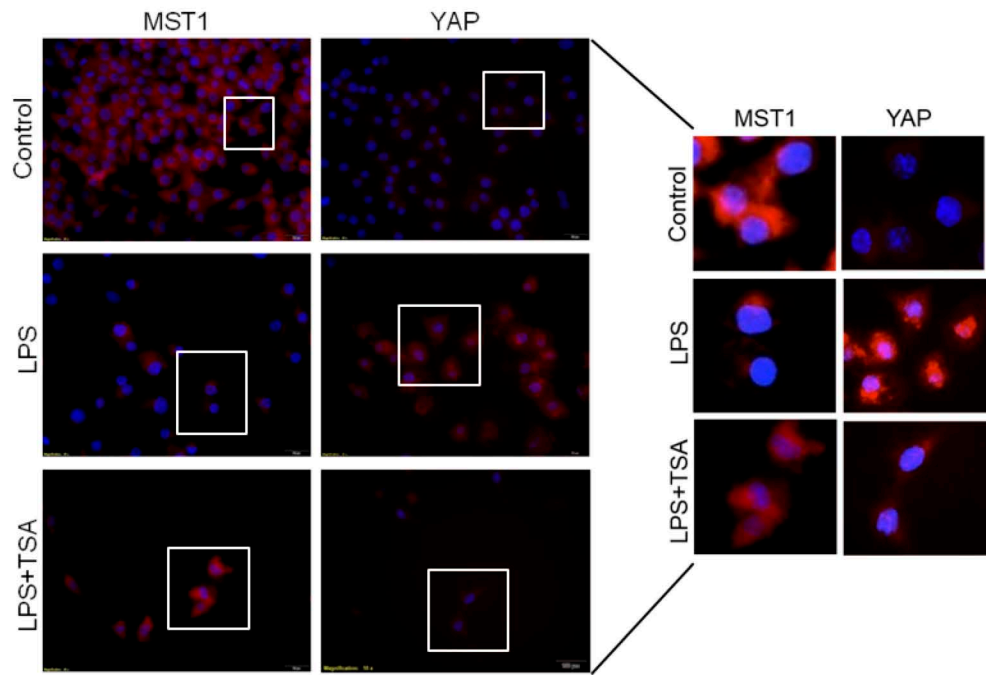

**Supplementary Table 1.** DNA sequences for qRT-PCR, mouse genotyping, ChIP, EMSA and DNA-pull down assays

| qRT-PCR             |                                                                 |                                                                |
|---------------------|-----------------------------------------------------------------|----------------------------------------------------------------|
| Gene                | Forward (5' to 3')                                              | Reverse (5' to 3')                                             |
| YAP                 | GGCTCTAAAGAACCCGAACC                                            | GCAGCTGAAGAAACCACCTC                                           |
| TNF- $\alpha$       | CCCTCACACTCAGATCATCTTCT                                         | GCTACGACGTGGGCTACAG                                            |
| IL-1 $\beta$        | GCAACTGTTCTGAACTCAACT                                           | ATCTTTTGGGGTCCGTCAAG                                           |
| MCP-1               | TTAAAAACCTGGATCGGAACCA                                          | GCATTAGCTTCAGATTTACGGG                                         |
| IL-6                | TAGTCCTTCCTACCCCAATTTC                                          | TTGGTCCTTAGCCACTCCTTC                                          |
| Mgl2                | TGGAGCGGGAAGAGAAAAACCAGG                                        | TCGAAGTTGTCAGCCCTGGAGTC                                        |
| Retnla              | CCAATCCAGCTAACTATCCCTCC                                         | CCAGTCAACGAGTAAGCACAG                                          |
| CD80                | CCATGTCCAAGGCTCATTCT                                            | TTCCAGCAATGACAGACAG                                            |
| CD86                | CAGTGCTGGCAAATCAAGAA                                            | TTGCACAGCATTCTCCAGAC                                           |
| TIMP1               | AGGTGGTCTCGTTGATTTCT                                            | GTAAGGCCTGTAGCTGTGCC                                           |
| Acta2               | ATCATGCGTCTGGACTTGG                                             | AATAGCCACGCTCAGTCAGG                                           |
| Col1a1              | GCTCCTCTTAGGGGCCACT                                             | ATTGGGGACCCTTAGGCCAT                                           |
| SREBP               | ACGGCAGCCCCTGTAACGACCACTGT                                      | TGCCAAGATGGTTCCGCCACTCACCA                                     |
| SCD1                | CCGGAGACCCTTAGATCGA                                             | TAGCCTGTAAAAGATTTCTGCAAACC                                     |
| FASN                | AGCGGCCATTTCCATTGCC                                             | CCATGCCCAGAGGGTGGTTG                                           |
| PPAR $\alpha$       | GTACTGTTCGGTTTCAGAAAGTGCC                                       | ATCTCCGCCAACAGCTTCTCCT                                         |
| ACC1                | ACTTCCCGACCAAGGACTTTG                                           | ACAGTGGAGCTAGAATTGGAC                                          |
| 18S                 | CGCTTCCTTACCTGGTTGAT                                            | GAGCGACCAAAGGAACCATA                                           |
| Mouse genotyping    |                                                                 |                                                                |
| Region              | Forward (5' to 3')                                              | Reverse (5' to 3')                                             |
| LyzM                | CTTGGGCTGCCAGAATTTCTC                                           | CCCAGAAATGCCAGATTACG                                           |
| TLR4                | TGACCACCCATATTGCCTATAC                                          | TGATGGTGTGAGCAGGAGAG                                           |
| YAP                 | AGGACAGCCAGGACTACACAG                                           | CACCAGCCTTTAAATTGAGAAC                                         |
| ChIP assay          |                                                                 |                                                                |
| Region              | Forward (5' to 3')                                              | Reverse (5' to 3')                                             |
| YAP                 | ACTAAGACCTCGCCTTGTGC                                            | GTCCAGTTACCCACACAGG                                            |
| MCP1                | GCCATGGAATAAACACAGCA                                            | GAGCGGAGTCTTCCACTCAG                                           |
| TNF- $\alpha$       | GAGGGGAATCCTTGGAAGAC                                            | AATTCACGGACCTCACAAGC                                           |
| IL-6                | TCCACCCATGTTTAACTTTCTT                                          | ATTGAGAATGCAAAAAGGAGAAT                                        |
| DNA-pull down assay |                                                                 |                                                                |
| Region              | Forward (5' to 3')                                              | Reverse (5' to 3')                                             |
| WT                  | 5'Bio/ATATCCATTGACTCATTTAATGTC                                  | 5'Bio/GACATTAATGAGTCAATGGATAT                                  |
| Mut                 | 5'Bio/ATATCCATCATGCATTTAATGTC                                   | 5'Bio/GACATTAATGATGATGGATAT                                    |
| EMSA                |                                                                 |                                                                |
| Region              | Forward (5' to 3')                                              | Reverse (5' to 3')                                             |
| WT                  | 5'IRD800/GGGCCAAGTACTTTATATCCATT<br>GACTCATTTAATGTCTCAACGACATAA | 5'IRD800/TTATGTCGTTGAGACATTAATGAGT<br>CAATGGATATAAAGTACTTGGCCC |
| Cold                | GGGCCAAGTACTTTATATCCATT<br>GACTCATTTAATGTCTCAACGACATAA          | TTATGTCGTTGAGACATTAATGAGT<br>CAATGGATATAAAGTACTTGGCCC          |

## Supplementary Figure Legends

**Supplementary Figure S1. Myeloid cell specific YAP knockout mice did not affect on lipogenesis and fibrosis.** (A) qRT-PCR analysis for lipogenesis genes in the liver tissues from HFD-fed WT (n=4) and YAP<sup>φKO</sup> mice (n=6). (B) Representative images of trichrome staining of the liver tissues obtained from HFD-fed WT and YAP<sup>φKO</sup> mice (C) qRT-PCR analysis for fibrosis genes in the liver tissues from HFD-fed WT (n=4) and YAP<sup>φKO</sup> mice (n=6). The data are expressed as mean±S.E.M \*\*\**P*<0.001.

**Supplementary Figure S2. Comparison of inhibitory effect of NF-κB and YAP inhibitor on LPS induced inflammatory cytokines in Kupffer cells.** Primary Kupffer cells were treated with verteporfin (1 μM) or Bay11-7082 (3 μM) for 1 hour followed by LPS treatment (1 μg/ml) for 6 hrs. The pro-inflammatory cytokine gene expression were measured by qRT-PCR. The data are expressed as mean±S.D. \* *P*<0.001, compared to LPS treatment alone (p value were tested and calculated by Bonferroni-adjusted methods).

**Supplementary Figure S3. LPS decreases MST1 protein in macrophages. The effect is reversed by the HDAC inhibitor Trichostatin A (TSA).** (A) Raw264.7 cells were treated with LPS (1 μg/ml) for 24 hrs, and protein extracts were subjected to Western blot analysis to determine the expression of LATS, MST1, MST2. β-actin was used as the loading control. (B) LPS treatment did not alter the level of MST1 mRNA as measured by qRT-PCR. Raw264.7 cells were treated with LPS (1 μg/ml) for 24 h. (C) The HDAC inhibitor TSA reversed LPS-induced reduction of MST1 protein. Raw264.7 cells were pretreated with TSA (200 nM) for 1 hour

followed by LPS treatment (1  $\mu\text{g/ml}$ ) for 24 hours. (D) Immunofluorescence analysis for MST1 and YAP. Primary Kupffer cells isolated from wild type mice were pretreated with TSA (200 nM) for 1 hour followed by LPS treatment (1  $\mu\text{g/ml}$ ) for 24 hours. The right panels are high magnification images of the indicated square areas from the left panels (X 200).

## Supplementary Methods

**DNA pull down assay.** DNA pull down assay was performed according to a previous report with minor modification (22). Specifically, Raw 264.7 cells were treated with LPS for 24 hours and then lysed by sonication in HKMG buffer (10 mM HEPES, pH 7.9, 100 mM KCl, 5 mM MgCl<sub>2</sub>, 10% glycerol, and 0.5% NP-40) with protease inhibitors. Cell extracts were precleared with streptavidin-agarose beads for 1 hour, and the supernatant was then incubated with 1 µg of biotinylated double-stranded oligonucleotide and 10 µg poly (dI-dC) at 4°C for overnight. The oligonucleotide sequences are: 5'-Biotin-ATATCCATTGACTCATTTAATGTC-3'(WT) and 5'-Biotin-ATATCCATCATGCATTTTA ATGTC-3' (Mutant). The biotinylated oligonucleotides and their complementary strands were annealed in TEN buffers. DNA-bound protein was collected by incubation with streptavidin-agarose beads at 4°C for 1 hour. The agarose beads were washed four times with HKMG buffer and the samples were boiled in SDS-sample buffer prior to SDS-PAGE and Western blotting for c-jun and c-fos.
